# Supplementary material
Source: PubMed Central journal article supplement (PMC3957760)
Supplement: JCM.02341-13_zjm999093180so1.pdf [file JCM.02341-13_zjm999093180so1.pdf]

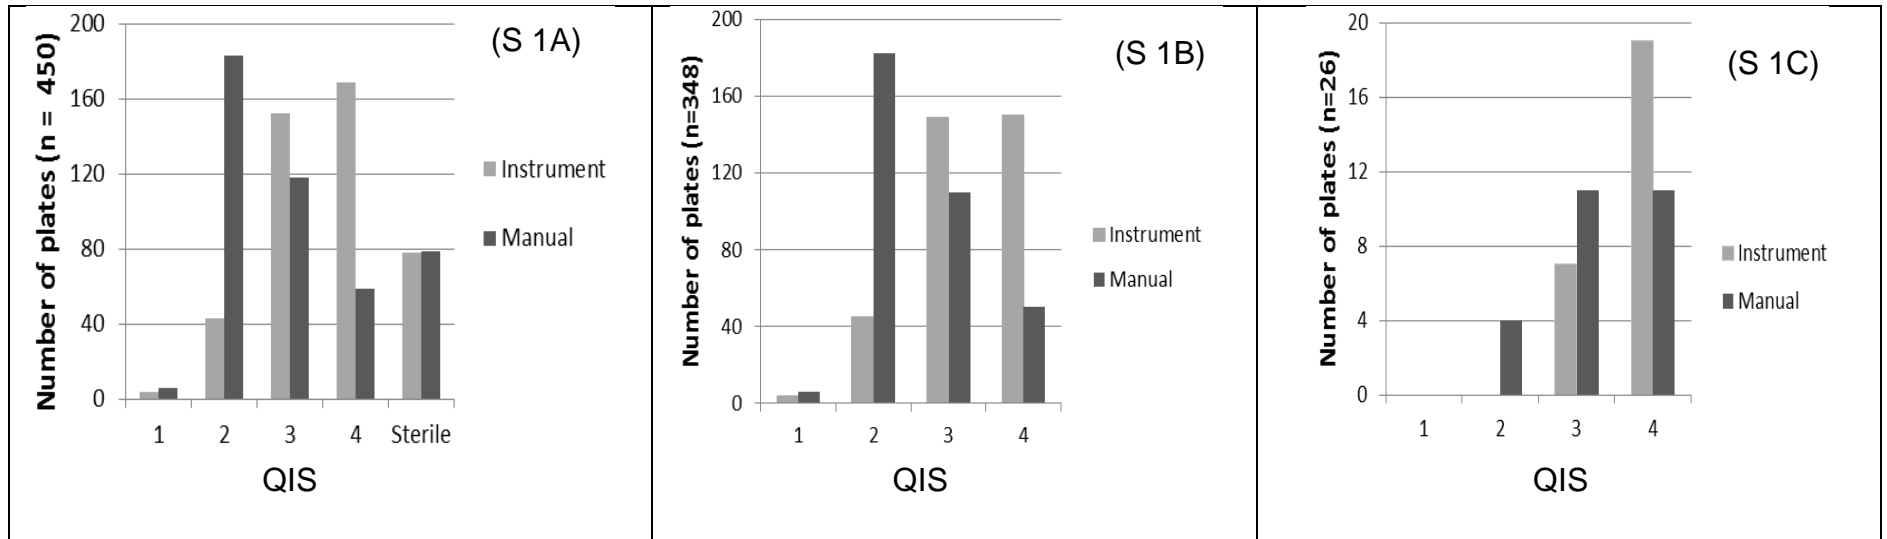

Fig. S1: Distribution of the quality isolation score (QIS) according to manual and automated methods for swabs (450 plates), a) all plates, b) polymicrobial plates only (n=348), and c) monomicrobial plates only (n=26)
