# Supplementary material
Source: PubMed Central journal article supplement (PMC3957760)
Supplement: JCM.02341-13_zjm999093180so2.pdf [file JCM.02341-13_zjm999093180so2.pdf]

Table S1: Comparison of quality of inoculation between FA-Inoqula and manual method at the team level. Characteristics of the results obtained for series of 10 swabs corresponding with 30 inoculated plates. A total of 15 technicians were evaluated

| No. series | No. sterile plates over 30 inoculated | Cumulative QIS   |                  | Cumulative QIS |        | Normalized cumulative score (NCS) |        | Difference in NCS (Automate–Manual) |
|------------|---------------------------------------|------------------|------------------|----------------|--------|-----------------------------------|--------|-------------------------------------|
|            |                                       | Minimum possible | Maximum possible | Inoqula        | Manual | Inoqula                           | Manual |                                     |
| 1          | 9                                     | 21               | 84               | 75             | 59     | 88                                | 67     | 21                                  |
| 2          | 8                                     | 22               | 88               | 67             | 52     | 74                                | 55     | 19                                  |
| 3          | 1                                     | 29               | 116              | 100            | 82     | 86                                | 70     | 16                                  |
| 4          | 7                                     | 23               | 92               | 78             | 62     | 84                                | 65     | 19                                  |
| 5          | 3                                     | 27               | 108              | 99             | 98     | 91                                | 90     | 1                                   |
| 6          | 9                                     | 21               | 84               | 72             | 67     | 84                                | 77     | 7                                   |
| 7          | 5                                     | 25               | 100              | 77             | 59     | 76                                | 57     | 19                                  |
| 8          | 4                                     | 26               | 104              | 83             | 61     | 79                                | 57     | 22                                  |
| 9          | 7                                     | 23               | 92               | 70             | 48     | 74                                | 48     | 26                                  |
| 10         | 7                                     | 23               | 92               | 75             | 53     | 80                                | 54     | 26                                  |
| 11         | 5                                     | 25               | 100              | 76             | 53     | 75                                | 51     | 24                                  |
| 12         | 4                                     | 26               | 104              | 93             | 70     | 89                                | 66     | 23                                  |
| 13         | 2                                     | 28               | 112              | 93             | 74     | 83                                | 65     | 17                                  |
| 14         | 4                                     | 26               | 104              | 88             | 65     | 84                                | 61     | 23                                  |
| 15         | 7                                     | 23               | 92               | 76             | 51     | 81                                | 52     | 29                                  |

NCS: Normalized cumulative score, which was calculated as follows:

$$(\text{cumulative QIS (technician)} - \text{minimum QIS possible}) * 100 / (\text{cumulative QIS}_{\text{max}} - \text{cumulative QIS}_{\text{min}})$$
